# Supplementary material for: The volatilome signatures of Plasmodium falciparum parasites during the intraerythrocytic development cycle in vitro under exposure to artemisinin drug
Source: PubMed Central journal article supplement (PMC10656521; doi:10.1038/s41598-023-46416-1), 2023-11-17
Supplement: 41598_2023_46416_MOESM4_ESM.pdf [file 41598_2023_46416_MOESM4_ESM.pdf]

**The volatilome signatures of Plasmodium falciparum parasites during the intraerythrocytic development cycle in vitro under exposure to artemisinin drug**

Zenaida Stead<sup>1</sup>, Rosamaria Capuano<sup>2,3</sup>, Corrado Di Natale<sup>2,3\*</sup>, Arnab Pain<sup>1\*</sup>

1. Bioscience Program, Biological and Environmental Sciences and Engineering (BESE) Division, KAUST, Jeddah, 239556900, Saudi Arabia
2. Department of Electronic Engineering, University of Rome Tor Vergata, Via del Politecnico 1, 00133 Roma, Italy.
3. Interdepartmental Centre for Volatilomics “A. D’Amico”, University of Rome Tor Vergata, Via del Politecnico 1, 00133 Roma, Italy.

**Supplementary Material**

| Parasite Strain | Country                           | Mutation (KELCH13)                            | Lab of origin |
|-----------------|-----------------------------------|-----------------------------------------------|---------------|
| NF54            | Country information not available | none                                          | F. Arieu      |
| NF54 C580Y      | Country information not available | C580Y                                         | F. Arieu      |
| 3D7             | Country information not available | none                                          | F. Arieu      |
| MRA-1169        | Tanzania                          | VBRF01000024.1:1,727,849T>G                   | M. Fried      |
| MRA-1251        | Cambodia                          | C580Y                                         | DA. Fidock    |
| MRA-464         | Sudan                             | VBRF01000025.1: 1,727,988 Insertion of ATTATT | TE Wellmans   |

**Table S1:** Summary information table of parasite strains used for this study.

22  
23  
24  
25  
26

|    | <b>Putative identification</b> | <b>CAS #</b>            | <b>Similarity</b> | <b>Rings,<br/>schizonts,<br/>and<br/>trophozoites</b> | <b>Artemisinin<br/>treated<br/>wild-type<br/>and<br/>resistant<br/>parasites</b> | <b>Lab-<br/>adapted<br/>field<br/>isolates<br/>with<br/>different<br/>genotypes</b> |
|----|--------------------------------|-------------------------|-------------------|-------------------------------------------------------|----------------------------------------------------------------------------------|-------------------------------------------------------------------------------------|
| 1  | 2-Butanamine, (S)-             | 513-49-5                | 88%               |                                                       |                                                                                  |                                                                                     |
| 2  | Pentanal                       | 110-62-3                | 87%               |                                                       |                                                                                  |                                                                                     |
| 3  | Octane, 3-methyl-              | 2216-33-3               | 89%               |                                                       |                                                                                  |                                                                                     |
| 4  | Pentane, 2,3,3-trimethyl-      | 560-21-4                | 94%               | <b>X</b>                                              |                                                                                  |                                                                                     |
| 5  | Heptane, 3-ethyl-5-methylene-  | 537680 (PubChem<br>CID) | 79%               |                                                       |                                                                                  |                                                                                     |
| 6  | Heptane, 4-methyl-             | 589-53-7                | 90%               | <b>X</b>                                              | <b>X</b>                                                                         | <b>X</b>                                                                            |
| 7  | Hexane, 2,2,4-trimethyl-       | 16747-26-5              | 91%               | <b>X</b>                                              |                                                                                  | <b>X</b>                                                                            |
| 8  | Hexanal                        | 66-25-1                 | 93%               | <b>X</b>                                              | <b>X</b>                                                                         | <b>X</b>                                                                            |
| 9  | 2,4-Dimethyl-1-heptene         | 19549-87-2              | 95%               | <b>X</b>                                              | <b>X</b>                                                                         | <b>X</b>                                                                            |
| 10 | Dimethyl sulfide               | 75-18-3                 | 85%               |                                                       |                                                                                  |                                                                                     |
| 11 | Ethylbenzene                   | 100-41-4                | 89%               | <b>X</b>                                              | <b>X</b>                                                                         |                                                                                     |
| 12 | o-Xylene                       | 95-47-6                 | 85%               |                                                       |                                                                                  | <b>X</b>                                                                            |
| 13 | Cyclohexanol                   | 108-93-0                | 95%               | <b>X</b>                                              |                                                                                  |                                                                                     |

|    |                                               |            |     |   |   |   |
|----|-----------------------------------------------|------------|-----|---|---|---|
| 14 | Styrene                                       | 100-42-5   | 97% | X | X | X |
| 15 | Hexanoic acid, 2-pentenyl ester,<br>(Z)-      | 74298-89-8 | 84% | X |   |   |
| 16 | 2,5-Dimethylhexane-2,5-<br>dihydroperoxide    | 3025-88-5  | 80% | X | X | X |
| 17 | 2-Heptanone, 4-methyl-                        | 6137-6-0   | 92% | X | X | X |
| 18 | 1-Octanol, 2,7-dimethyl-                      | 15250-22-3 | 85% | X |   | X |
| 19 | Benzaldehyde                                  | 100-52-7   | 91% | X | X | X |
| 20 | Benzene, 1,3,5-trimethyl                      | 108-67-8   | 85% | X |   | X |
| 21 | 2-tert-Butoxytetrahydrofuran                  | 1927-59-9  | 86% |   |   |   |
| 22 | Benzene, 1-ethyl-3-methyl-                    | 620-14-4   | 91% | X | X | X |
| 23 | n-Caproic acid vinyl ester                    | 3050-69-9  | 91% |   |   |   |
| 24 | Benzene, 1,2,3-trimethyl-                     | 526-73-8   | 83% | X | X | X |
| 25 | Heptane, 2,5,5-trimethyl-                     | 1189-99-7  | 90% | X |   | X |
| 26 | 3-Ethyl-3-methylheptane                       | 17302-1-1  | 90% | X | X | X |
| 27 | 1-Octene, 3,7-dimethyl-                       | 4984-01-4  | 88% | X | X | X |
| 28 | 1-Hexanol, 2-ethyl-                           | 104-76-7   | 94% | X | X | X |
| 29 | Indane                                        | 496-11-7   | 91% | X | X | X |
| 30 | 1-Octene, 2,6-dimethyl-                       | 6874-29-9  | 75% |   |   |   |
| 31 | Decane                                        | 124-18-5   | 75% | X | X | X |
| 32 | Benzene, 4-ethyl-1,2-dimethyl-                | 934-80-5   | 91% | X |   | X |
| 33 | Benzenemethanol,<br>.alpha.,.alpha.-dimethyl- | 617-94-7   | 83% | X | X |   |
| 34 | Benzoic acid, methyl ester                    | 93-58-3    | 92% |   |   | X |
| 35 | Nonanal                                       | 124-19-6   | 93% | X | X |   |
| 36 | Benzene, 1,4-diethyl-                         | 105-5-5    | 83% | X |   |   |
| 37 | Benzene, 1,2,4,5-tetramethyl-                 | 95-93-2    | 90% | X |   |   |
| 38 | o-Cymene                                      | 527-84-4   | 95% | X |   |   |
| 39 | 4-Nonanone, 7-ethyl-                          | 40237-88-5 | 79% |   |   | X |

|    |                                                             |                      |     |   |   |   |
|----|-------------------------------------------------------------|----------------------|-----|---|---|---|
| 40 | Cyclopropane, 1-methyl-1-phenyl-                            | 2214-14-4            | 82% | X |   |   |
| 41 | Nonane, 3,7-dimethyl-                                       | 17302-32-8           | 91% |   |   | X |
| 42 | 3-Ethyl-4-methyl-3-heptanol                                 | 66719-39-9           | 86% | X |   | X |
| 43 | 4-Methyldocosane                                            | 25117-30-0           | 82% | X |   | X |
| 44 | Octanoic acid, 7-oxo-                                       | 14112-98-2           | 82% | X |   |   |
| 45 | Azulene                                                     | 275-51-4             | 85% |   |   | X |
| 46 | Dodecane                                                    | 112-40-3             | 96% | X | X | X |
| 47 | Sulfurous acid, decyl 2-ethylhexyl ester                    | 6420775(PubChem CID) | 90% | X |   | X |
| 48 | Decane, 2,3,5,8-tetramethyl-                                | 192823-15-7          | 87% |   |   |   |
| 49 | Oxalic acid, bis(2-ethylhexyl) ester                        | 13675-20-2           | 90% | X |   | X |
| 50 | Benzene, 1,3-bis(1,1-dimethylethyl)-                        | 1014-60-4            | 96% | X | X |   |
| 51 | 1-Undecene, 4-methyl-                                       | 74630-39-0           | 94% |   |   |   |
| 52 | 1-Iodo-2-methylundecane                                     | 73105-67-6           | 90% |   |   |   |
| 53 | Nonane, 5-(2-methylpropyl)-                                 | 62185-53-9           | 90% |   |   |   |
| 54 | Tridecane                                                   | 629-50-5             | 96% | X | X |   |
| 55 | 1-Heptanol, 2-propyl-                                       | 10042-59-8           | 85% |   |   |   |
| 56 | Octadecane, 1-(ethenyloxy)-                                 | 930-2-9              | 84% |   |   |   |
| 57 | 2,4-Decadienal, (E,E)-                                      | 25152-84-5           | 91% |   |   | X |
| 58 | 2,2,6,7-Tetramethyl-10-oxatricyclo[4.3.0.1(1,7)]decan-5-one | 121747-63-5          | 80% | X | X |   |
| 59 | Cyclopentene, 5-hexyl-3,3-dimethyl-                         | 61142-66-3           | 85% |   |   |   |
| 60 | Not Identified                                              | -                    | 0%  | X |   | X |
| 61 | Tetradecane                                                 | 629-59-4             | 92% | X | X | X |
| 62 | 2,5-di-tert-Butyl-1,4-benzoquinone                          | 2460-77-7            | 86% |   |   |   |

27  
28  
29  
30  
31  
32  
33

**Table S2:** List of VOCs detected in at least one sample. For each VOC, the putative name and the corresponding CAS is reported. The similarity is the score in percentage of the correspondence of the detected mass spectra with NIST20R library. Crosses indicate the VOCs that was found in all replicas of at least one group of samples in the each of the three experiments.

|    |                                          | ALBUMAX |     |     |     |     |     | HUMAN SERUM |     |     |     |     |     |     |    |
|----|------------------------------------------|---------|-----|-----|-----|-----|-----|-------------|-----|-----|-----|-----|-----|-----|----|
|    |                                          | bkg     | 3D7 | Cam | K13 | Sud | Tan | WT          | bkg | 3D7 | Cam | K13 | Sud | Tan | WT |
| 1  | Heptane, 4-methyl-                       |         |     |     |     |     |     |             |     |     |     |     |     |     |    |
| 2  | Hexane, 2,2,4-trimethyl-                 |         |     |     |     |     |     |             |     |     |     |     |     |     |    |
| 3  | Hexanal                                  |         |     |     |     |     |     |             |     |     |     |     |     |     |    |
| 4  | 2,4-Dimethyl-1-heptene                   |         |     |     |     |     |     |             |     |     |     |     |     |     |    |
| 5  | o-Xylene                                 |         |     |     |     |     |     |             |     |     |     |     |     |     |    |
| 6  | 'Styrene '                               |         |     |     |     |     |     |             |     |     |     |     |     |     |    |
| 7  | 2,5-Dimethylhexane-2,5-dihydroperoxide   |         |     |     |     |     |     |             |     |     |     |     |     |     |    |
| 8  | 2-Heptanone, 4-methyl-                   |         |     |     |     |     |     |             |     |     |     |     |     |     |    |
| 9  | 1-Octanol, 2,7-dimethyl-                 |         |     |     |     |     |     |             |     |     |     |     |     |     |    |
| 10 | benzaldehyde                             |         |     |     |     |     |     |             |     |     |     |     |     |     |    |
| 11 | Mesitylene                               |         |     |     |     |     |     |             |     |     |     |     |     |     |    |
| 12 | Benzene, 1-ethyl-3-methyl-               |         |     |     |     |     |     |             |     |     |     |     |     |     |    |
| 13 | Benzene, 1,2,3-trimethyl-                |         |     |     |     |     |     |             |     |     |     |     |     |     |    |
| 14 | Heptane, 2,5,5-trimethyl-                |         |     |     |     |     |     |             |     |     |     |     |     |     |    |
| 15 | 3-Ethyl-3-methylheptane                  |         |     |     |     |     |     |             |     |     |     |     |     |     |    |
| 16 | 1-Octene, 3,7-dimethyl-                  |         |     |     |     |     |     |             |     |     |     |     |     |     |    |
| 17 | 1-Hexanol, 2-ethyl-                      |         |     |     |     |     |     |             |     |     |     |     |     |     |    |
| 18 | Indane                                   |         |     |     |     |     |     |             |     |     |     |     |     |     |    |
| 19 | Dodecane                                 |         |     |     |     |     |     |             |     |     |     |     |     |     |    |
| 20 | Benzene, 4-ethyl-1,2-dimethyl-           |         |     |     |     |     |     |             |     |     |     |     |     |     |    |
| 21 | Benzoic acid, methyl ester               |         |     |     |     |     |     |             |     |     |     |     |     |     |    |
| 22 | 4-Nonanone, 7-ethyl-                     |         |     |     |     |     |     |             |     |     |     |     |     |     |    |
| 23 | Nonane, 3,7-dimethyl-                    |         |     |     |     |     |     |             |     |     |     |     |     |     |    |
| 24 | 3-Ethyl-4-methyl-3-heptanol              |         |     |     |     |     |     |             |     |     |     |     |     |     |    |
| 25 | 4-Methyldocosane                         |         |     |     |     |     |     |             |     |     |     |     |     |     |    |
| 26 | Azulene                                  |         |     |     |     |     |     |             |     |     |     |     |     |     |    |
| 27 | Dodecane                                 |         |     |     |     |     |     |             |     |     |     |     |     |     |    |
| 28 | Sulfurous acid, decyl 2-ethylhexyl ester |         |     |     |     |     |     |             |     |     |     |     |     |     |    |
| 29 | 'Oxalic acid, bis(2-ethylhexyl) ester'   |         |     |     |     |     |     |             |     |     |     |     |     |     |    |
| 30 | 2,4-Decadienal, (E,E)-                   |         |     |     |     |     |     |             |     |     |     |     |     |     |    |
| 31 | UNIDENTIFIED                             |         |     |     |     |     |     |             |     |     |     |     |     |     |    |
| 32 | Tetradecane                              |         |     |     |     |     |     |             |     |     |     |     |     |     |    |

35

36 **Supplementary Table 3:** Presence (green) and absence (white) of all volatile organic compounds

37 found in Albumax cultured samples and Human serum cultured samples.

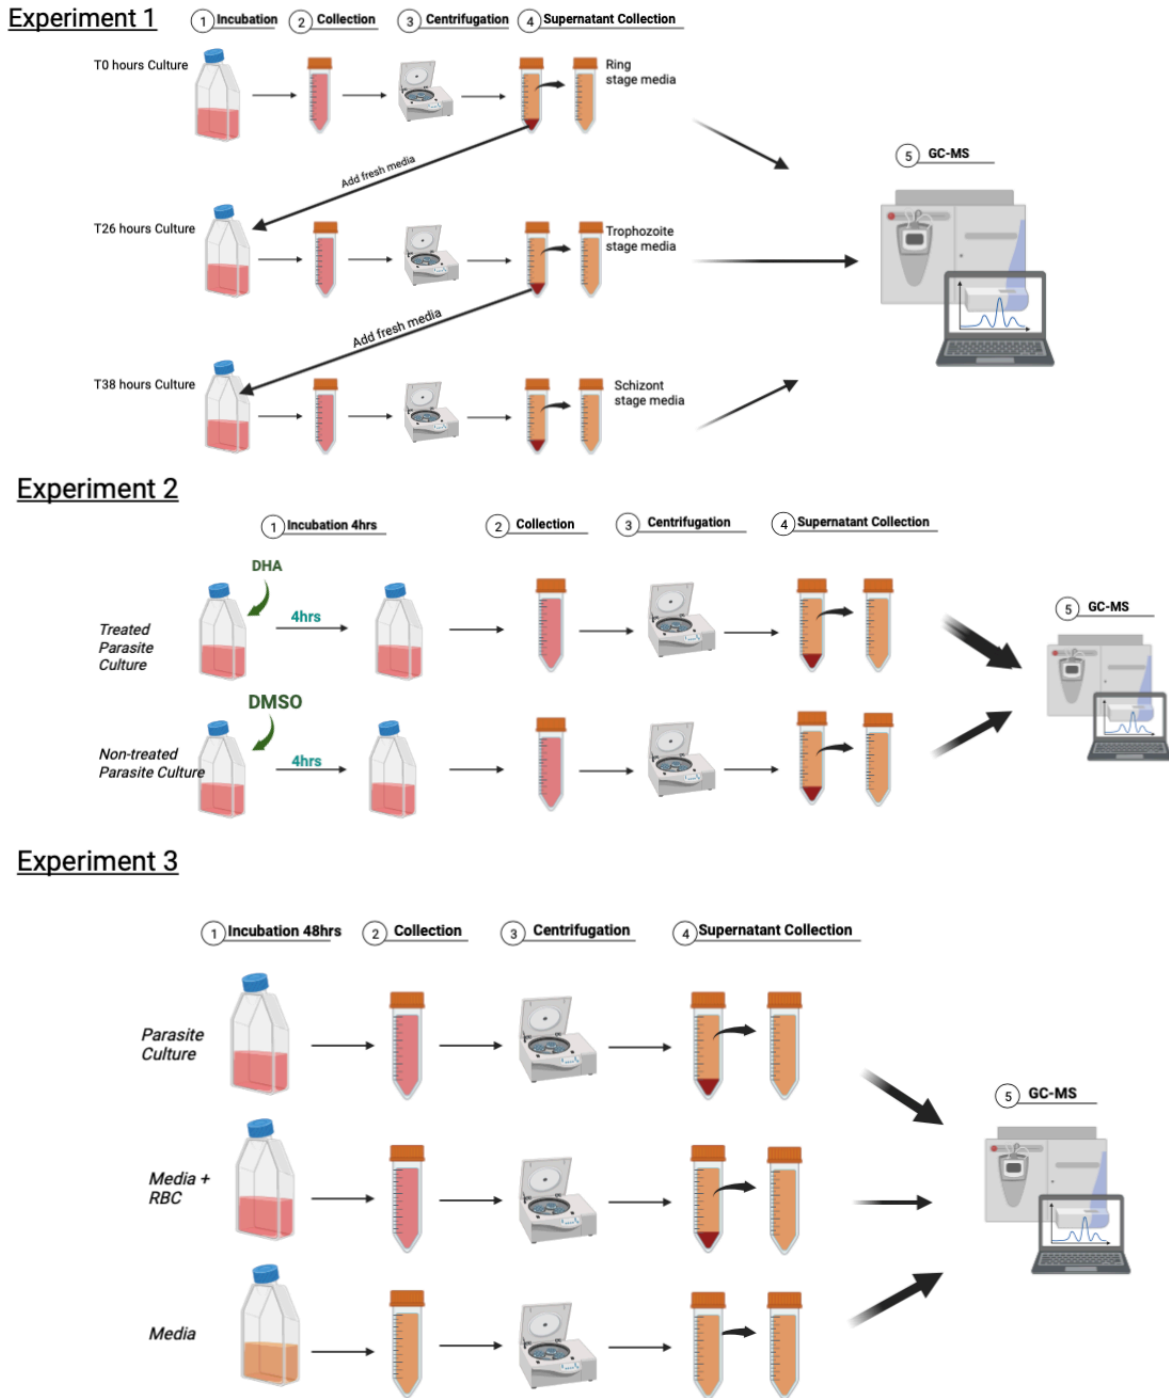

38

39 **Figure S1:** Experimental set up. Experiment 1: Synchronized asexual parasite cultures had fresh  
 40 media added at T0 hpi. Supernatant was collected at 26hpi, fresh media was added on top of  
 41 remaining iRBC culture and then collected at 38hpi. This process was repeated for final  
 42 supernatant collection timepoint at 48hpi. Collected supernatants were measured using GC-MS.  
 43 Experiment 2: Synchronized asexual parasite cultures at 6hpi ring stage were treated with

44 dihydroartemisin or DMSO for 4 hours. Supernatants were collected and measured using GC-  
45 MS. Experiment 3: Synchronized asexual parasite cultures of field isolate and lab strains were  
46 cultured for 48hrs, supernatants were collected and measured using GC-MS.

47



48  
49  
50  
51

**Figure S2:** Distribution of the abundance of the compounds composing the Volatilomic profiles of rings, schizonts, and trophozoites stages.

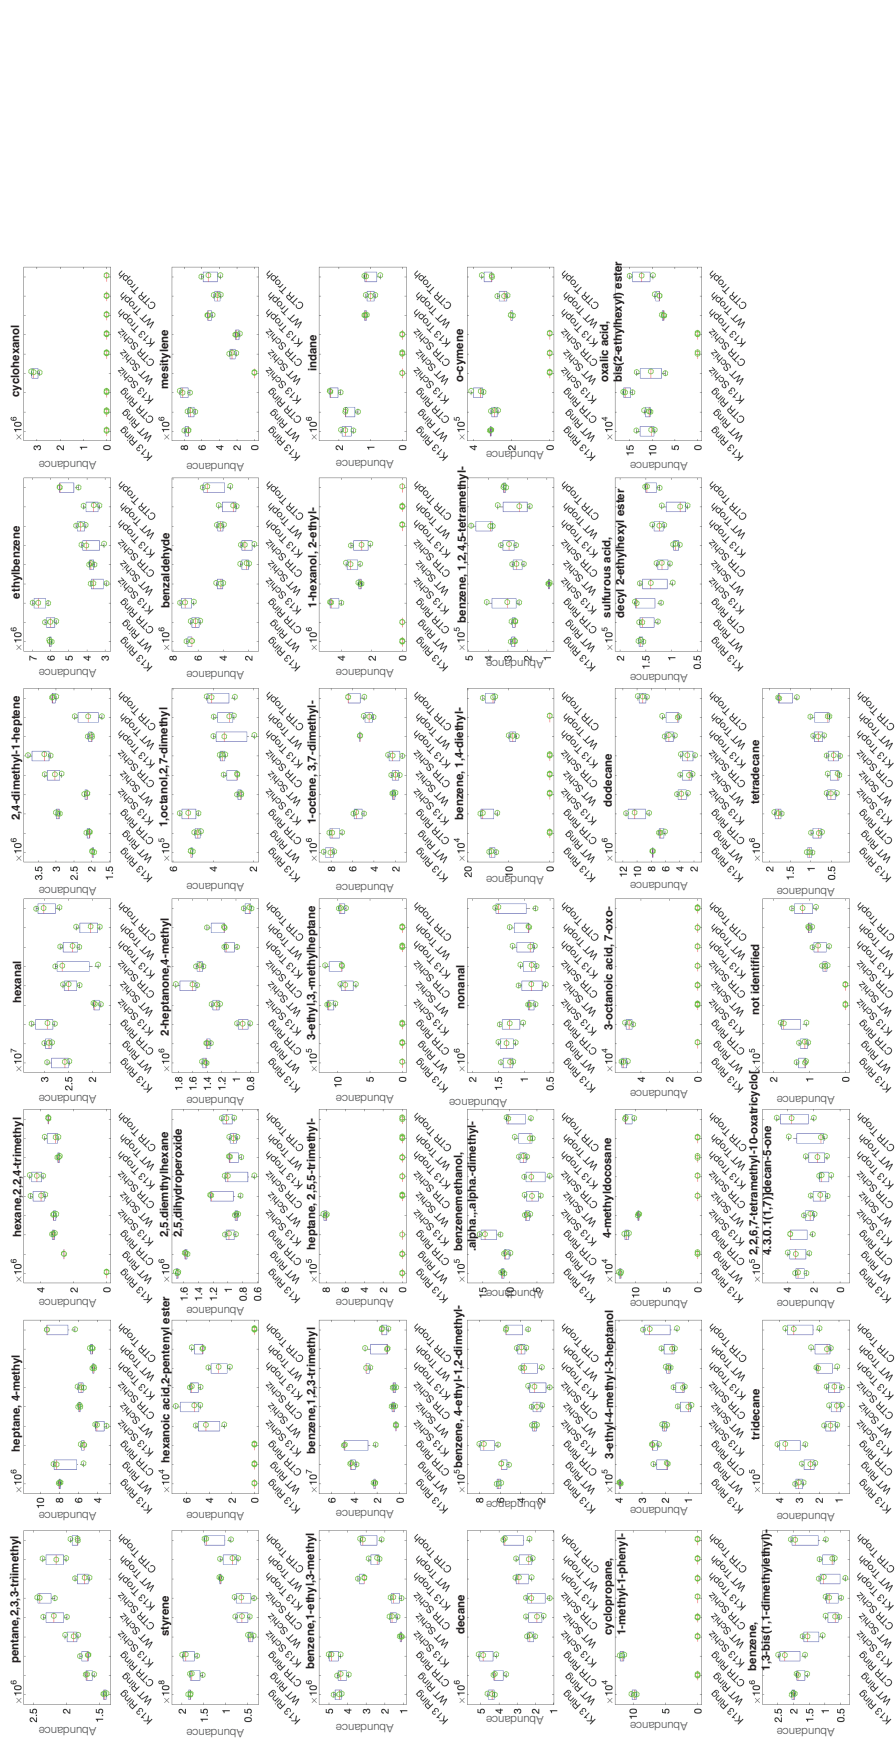

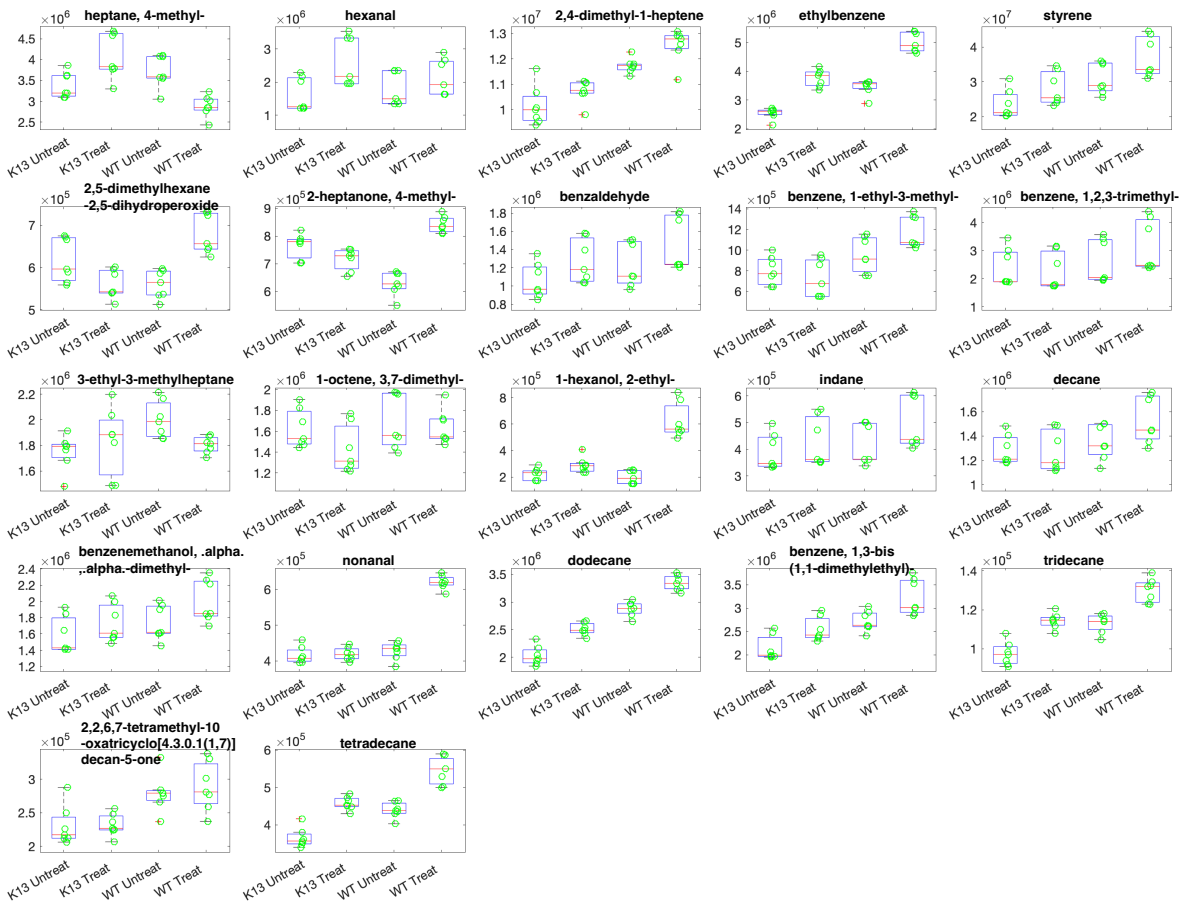

53  
54  
55  
56  
57

**Figure S3:** Distribution of the abundances of the compounds composing the Volatilome profile of artemisinin treated and untreated wild-type and resistant parasites.

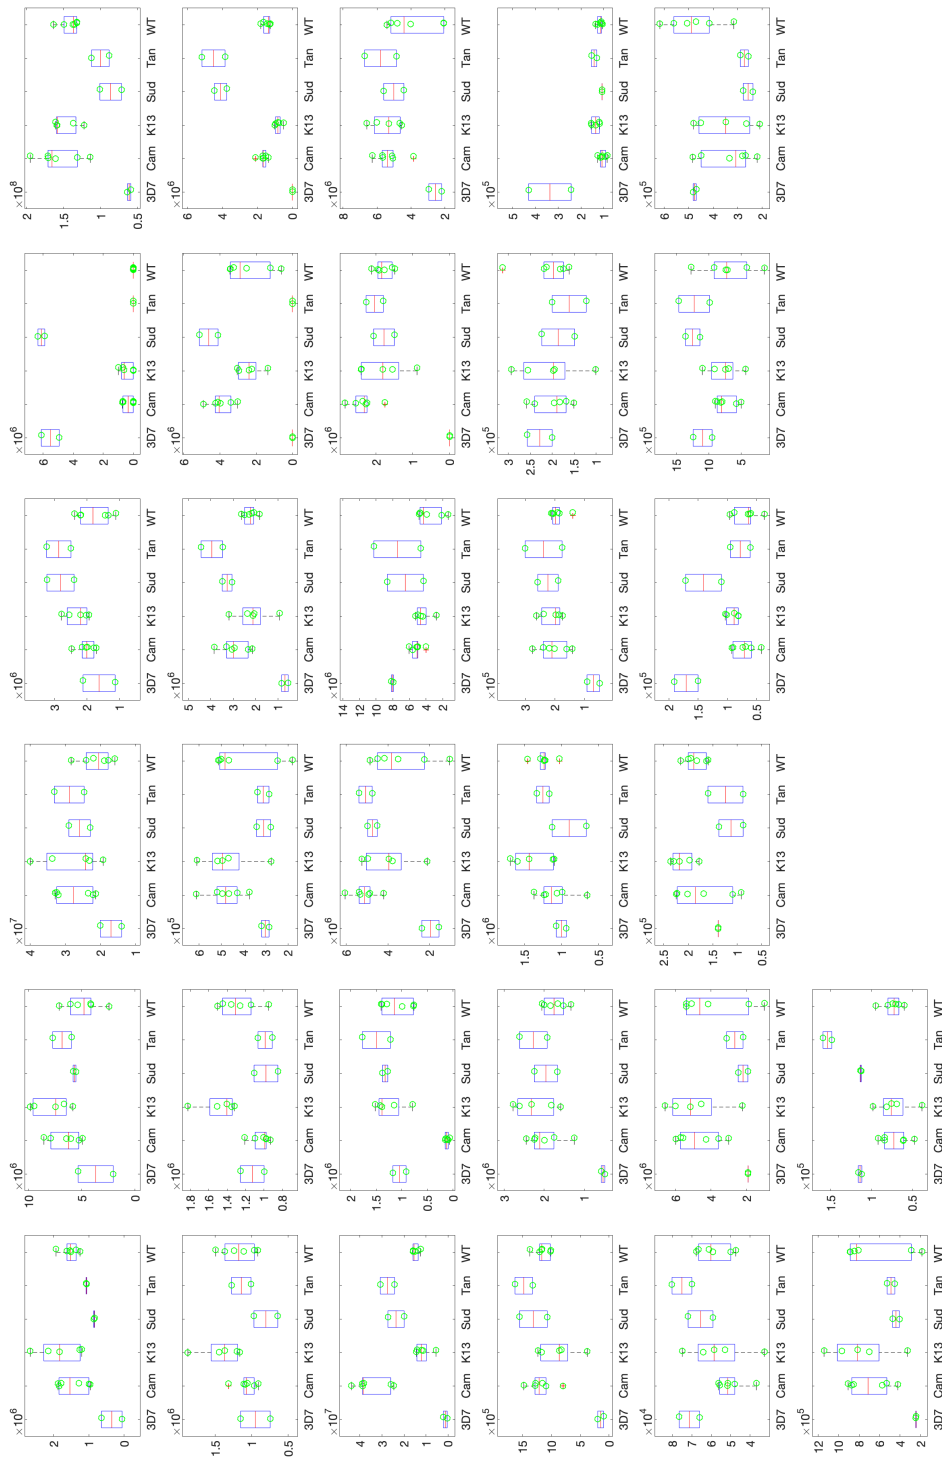

58  
59

60 **Figure S4** Distribution of the abundances of the compounds composing the Volatilome profile of  
61 lab-adapted and field isolated parasites cultured in Albumax.

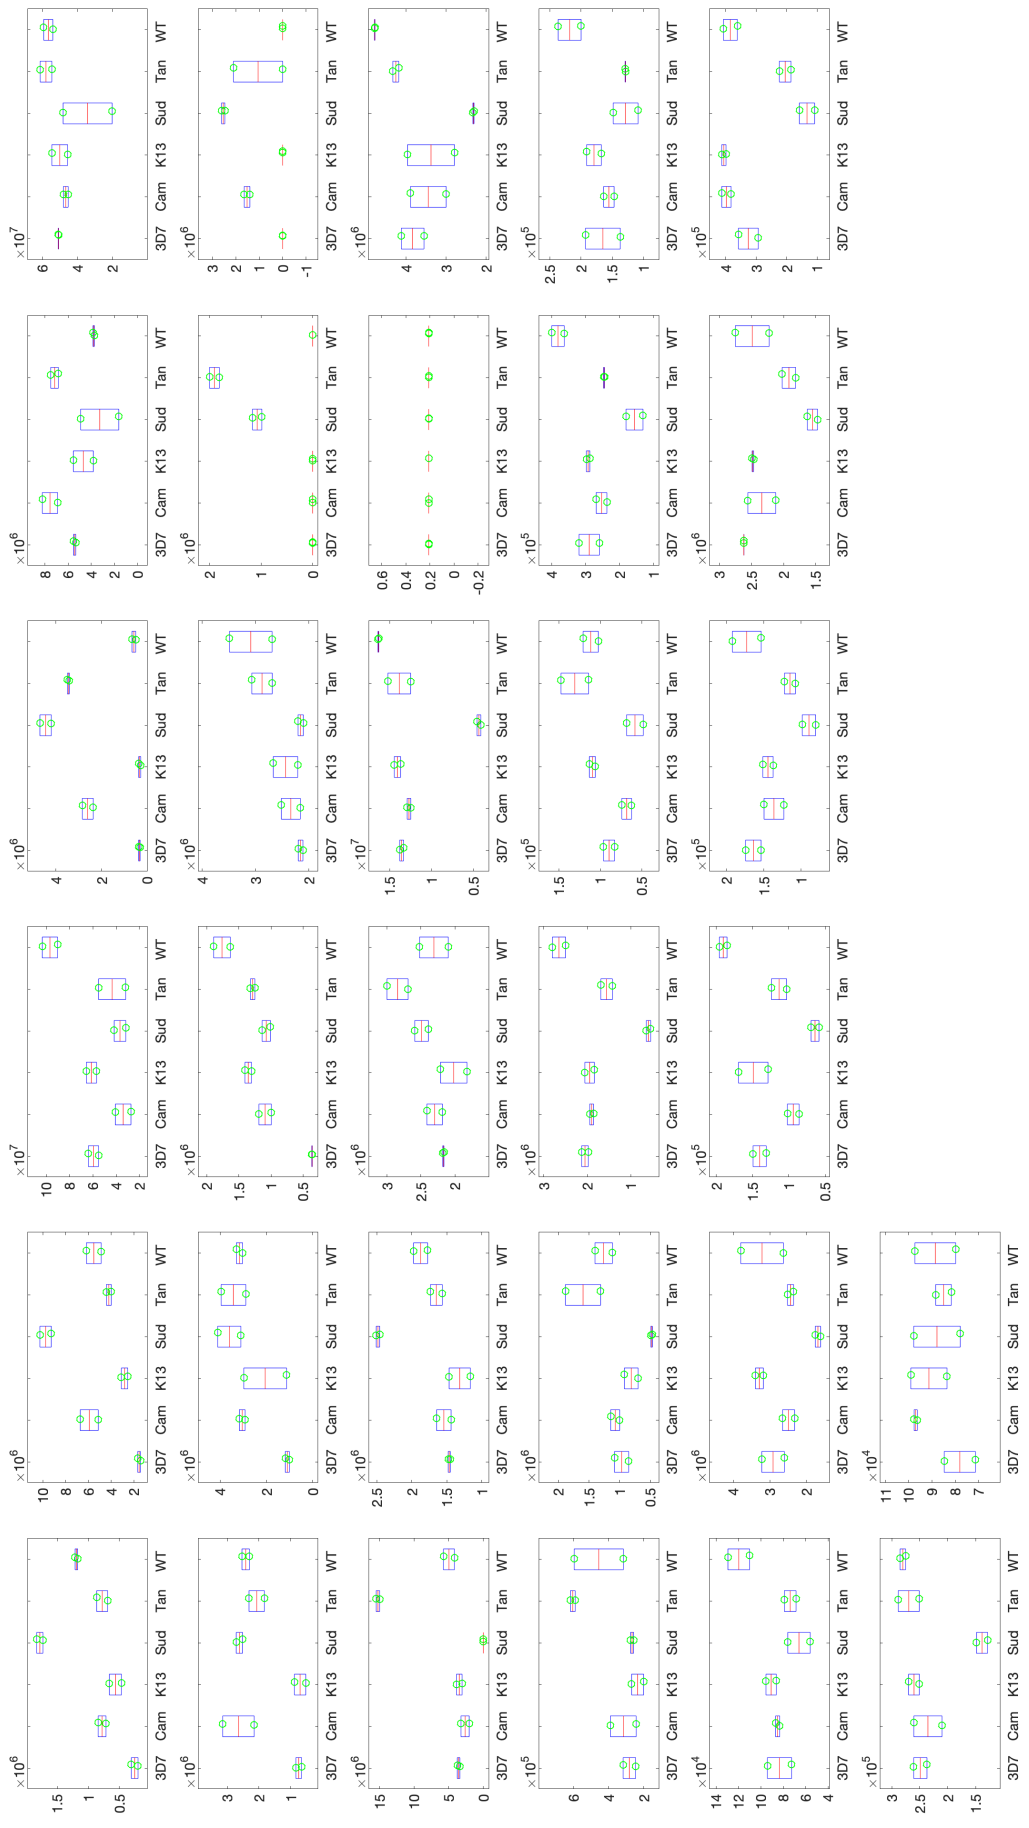

63 **Figure S5:** Distribution of the abundances of the compounds composing the Volatilome profile  
64 of lab-adapted and field isolated parasites cultured in Human Serum.
